# Supplementary material for: Alexithymia in Patients with Somatization Difficulties and Tinnitus-Related Distress: A Systematic Review
Source: MDPI journal article supplement (doi:10.3390/jcm12216828), 2023-10-29
Supplement: s1 [file s1]

**Supplementary Table S1.** Overview of Included Treatment Studies focusing on Alexithymia and Somatoform Conditions

| ID | Author(s) & Year                                                  | Title                                                                                                                                                                          | Measurement timepoints           | Type of treatment                                                                                                                                                                                                                                    | Outcome measurement                                    | Study outcome                                                                                                                                                                                                                                                                                                                                                                                                                         |
|----|-------------------------------------------------------------------|--------------------------------------------------------------------------------------------------------------------------------------------------------------------------------|----------------------------------|------------------------------------------------------------------------------------------------------------------------------------------------------------------------------------------------------------------------------------------------------|--------------------------------------------------------|---------------------------------------------------------------------------------------------------------------------------------------------------------------------------------------------------------------------------------------------------------------------------------------------------------------------------------------------------------------------------------------------------------------------------------------|
| 1  | Aboussouan , Mandell, Johnson, Thompson and Huffman [128]         | An interdisciplinary chronic pain rehabilitation program effectively treats impairment in sexual function, depression, alexithymia, and pain in women with chronic pelvic pain | - baseline<br>- post-treatment   | 3-4 week intensive interdisciplinary program consisting of medication management, psychotherapy (individual, family, group), psychoeducation, physical and occupational therapy, weaning from habituating medications and optional monthly aftercare | - TAS-20<br>- PDI<br>- DASS-21<br>- NRS-11             | - improvements in all outcome variables<br>- sexual function ( $\Delta = 3.75$ , $SE = 0.27$ )<br>- depression ( $\Delta = 13.86$ , $SE = 1.16$ )<br>- alexithymia ( $\Delta = 6.17$ , $SE = 1.19$ )<br>- pain ( $\Delta = 3.45$ , $SE = 0.23$ )<br>- changes in alexithymia, depressivity and pain severity were significant predictors for post treatment impairment in sexual function and chronic pelvic pain                     |
| 2  | Melin, Thulesius and Persson [76]                                 | Affect School for chronic benign pain patients showed improved alexithymia assessments with TAS-20                                                                             | - baseline<br>- post-treatment   | Affect School consisting of 8 sessions of group psychotherapy and 10 sessions of individual Script Analyses                                                                                                                                          | - TAS-20<br>- HADS<br>- VAS-pain<br>- EQoL<br>- SCI-93 | - higher baseline TAS-20 scores predicted significantly higher baseline depression, anxiety and stress symptoms<br>- TAS-20, DIF and DDF improved significantly, EOT did not<br>- significant post treatment improvements of alexithymia, depression and quality of life                                                                                                                                                              |
| 3  | Saariaho, Saariaho, Mattila, Joukamaa and Karukivi [129]          | The role of alexithymia: An eight-year follow-up study of chronic pain patients                                                                                                | - baseline<br>- 8-year-follow-up | treatment protocols based on biomedical concepts and recommendations                                                                                                                                                                                 | - TAS-20<br>- BDI-II<br>- PDS<br>- VAS                 | - pain intensity, pain disability and depressivity decreased significantly<br>- no significant longitudinal change in alexithymia<br>- alexithymic subjects reported significantly more pain disability and depressivity at baseline, and more pain intensity, pain disability and depressivity at follow-up<br>- non-improvements in pain intensity were significantly associated with male gender, baseline TAS-20 and DDF          |
| 4  | Saariaho, Saariaho, Mattila, Ohtonen, Joukamaa and Karukivi [130] | Alexithymia and depression in the recovery of chronic pain patients: a follow-up study                                                                                         | - baseline<br>- 1-year-follow-up | pain treatment methods consisting of invasive methods (anaesthesiological procedures / acupuncture) and non-invasive methods (drug therapy, physiotherapy, psychotherapy, pain groups)                                                               | - TAS-20<br>- BDI-II<br>- PDS<br>- VAS                 | - significant decrease of pain intensity, pain disability at follow-up<br>- TAS-20, DDF, and DIF increased significantly at follow-up in whole sample<br>- alexithymic patients reported significantly more pain disability and depression at both baseline and follow-up<br>- baseline TAS-20 was identified as significant predictor for pain disability<br>- BDI mediated between baseline TAS-20 and pain disability at follow-up |

|   |                                                                |                                                                                                           |                                                                                                                                                                                                         |                                                                                                                                           |                                                                                                                                                                                                  |                                                                                                                                                                                                                                                                                                                                                                                                                                                                                                                                                                                                                                                                                                                                                                                                                                                                                                                                                                                                                                                                                                                                              |
|---|----------------------------------------------------------------|-----------------------------------------------------------------------------------------------------------|---------------------------------------------------------------------------------------------------------------------------------------------------------------------------------------------------------|-------------------------------------------------------------------------------------------------------------------------------------------|--------------------------------------------------------------------------------------------------------------------------------------------------------------------------------------------------|----------------------------------------------------------------------------------------------------------------------------------------------------------------------------------------------------------------------------------------------------------------------------------------------------------------------------------------------------------------------------------------------------------------------------------------------------------------------------------------------------------------------------------------------------------------------------------------------------------------------------------------------------------------------------------------------------------------------------------------------------------------------------------------------------------------------------------------------------------------------------------------------------------------------------------------------------------------------------------------------------------------------------------------------------------------------------------------------------------------------------------------------|
| 5 | Porcelli, Bagby, Taylor, De Carne, Leandro and Todarello [131] | Alexithymia as Predictor of Treatment Outcome in Patients with Functional Gastrointestinal Disorders      | <ul style="list-style-type: none"> <li>- baseline</li> <li>- 6-months-follow-up</li> </ul>                                                                                                              | personalized treatment consisting of drugs, diet modifications, psychotropic medications, psychological counseling or brief psychotherapy | <ul style="list-style-type: none"> <li>- TAS-20</li> <li>- HADS</li> <li>- GSRS</li> </ul>                                                                                                       | <ul style="list-style-type: none"> <li>- unimproved patients reported significant higher scores of TAS-20, HADS-A, HADS-D and GSRS at baseline</li> <li>- TAS-20 correlated significantly with GSRS at baseline and follow-up</li> <li>- changes in TAS-20, HADS-A, HADS-D, GSRS were significant within patients improved in functional gastrointestinal disorder; unimproved just TAS-20 changed significantly</li> <li>- baseline TAS-20 significantly predicted TAS-20 at follow-up even when controlling for HADS-A and HADS-D baseline and follow-up scores</li> <li>- TAS-20 strongest assessed single predictor for treatment outcome</li> <li>- TAS-20 baseline scores increased prediction of variance of HADS-A, HADS-D and GSRS significantly</li> </ul>                                                                                                                                                                                                                                                                                                                                                                         |
| 6 | Reese [127]                                                    | Predicting improvement in Cognitive Behavioral Therapy for somatization disorder: The role of alexithymia | <ul style="list-style-type: none"> <li>- baseline</li> <li>- 3-months-follow-up (post baseline)</li> <li>- 9-months-follow-up (post baseline)</li> <li>- 15-months-follow-up (post baseline)</li> </ul> | 10-session individual CBT in combination of a psychiatric consultation letter (PCL)                                                       | <ul style="list-style-type: none"> <li>- TAS-20</li> <li>- CGI-SD</li> <li>- Daily Symptom Diary</li> <li>- SF-36</li> <li>- Marlowe-Crowne Social Desirability Scale</li> <li>- SSAS</li> </ul> | <ul style="list-style-type: none"> <li>- TAS-20 highly stable over time</li> <li>- alexithymic subjects reported poorer mental health, more anxiousness and lower defensiveness at baseline, and more anxiousness and better physical functioning at follow-up</li> <li>- defensiveness negatively correlated with DIF and DDF</li> <li>- changes in TAS-20, DIF, DDF significantly correlated to improvement of somatization symptoms (CGI-SD) and physical functioning at post-treatment and 12months-follow-up</li> <li>- EOT changes significantly correlated to CGI-SD improvement at post-treatment</li> <li>- EOT significant correlated to duration of symptoms</li> </ul> <p><u>changes of alexithymia</u></p> <ul style="list-style-type: none"> <li>- TAS-20 score significant time-condition interaction</li> <li>- CBT+PCL significantly changed more in DIF than PCL</li> <li>- treatment groups changed significantly in TAS-20, DIF and EOT</li> </ul> <p><u>Intent-to-treat</u></p> <ul style="list-style-type: none"> <li>- high defensiveness + high anxiety significantly scored higher on TAS-20 at baseline</li> </ul> |

- high anxiety scored significantly higher on DIF at baseline
- repressors = greater mental health than groups with high anxiety
- low anxiety + low defensiveness greater mental health at baseline than low defensiveness + high anxiety
- high defensiveness + high anxiety and low defensiveness + high anxiety scored higher in TAS-20 than repressors
- Follow-up: high defensiveness + high anxiety scored higher on alexithymia than repressors
- Post-treatment: defensiveness + high anxiety and low defensiveness + high anxiety scored higher on DIF than repressors
- Follow-up: high defensiveness + high anxiety scored higher on DIF
- Post-treatment: Low defensiveness + high anxiety scored higher on DDF than repressors

#### Mediational Analyses

- treatment condition significantly predicted improvement in somatization symptoms and improvement in changes of TAS-20, DIF and EOT at post-treatment; improvement in somatization symptoms was significantly predicted by changes in TAS-20, DIF and EOT
- treatment condition significantly predicted greater physical functioning at post-treatment; physical functioning was also predicted by changes in TAS-20, DIF
- treatment condition significantly predicted improvement in somatization symptoms at 12-months-follow-up; improvement in somatization symptoms was significantly predicted by changes in TAS-20, DIF and DDF
- treatment condition significantly predicted greater physical functioning at 12-months-follow-up; changes in TAS-20 and DIF additionally predicted physical functioning
- treatment predicted daily diary scores; changes in EOT predicted diary scores at post-treatment; treatment predicted diary scores at 12-months-follow-up

|   |                                                                        |                                                                                                                                                                                    |                                                                                                                      |                                                                                                                                                                                                                                                    |                                                                                                                               |                                                                                                                                                                                                                                                                                                                                                                                                                                                                                                                                                                                                                                |
|---|------------------------------------------------------------------------|------------------------------------------------------------------------------------------------------------------------------------------------------------------------------------|----------------------------------------------------------------------------------------------------------------------|----------------------------------------------------------------------------------------------------------------------------------------------------------------------------------------------------------------------------------------------------|-------------------------------------------------------------------------------------------------------------------------------|--------------------------------------------------------------------------------------------------------------------------------------------------------------------------------------------------------------------------------------------------------------------------------------------------------------------------------------------------------------------------------------------------------------------------------------------------------------------------------------------------------------------------------------------------------------------------------------------------------------------------------|
| 7 | Probst, Sattel, Gündel, Henningsen, Kruse, Schneider and Lahmann [126] | Moderating Effects of Alexithymia on Associations between the Therapeutic Alliance and the Outcome of Brief Psychodynamic-Interpersonal Psychotherapy for Multisomatoform Disorder | <ul style="list-style-type: none"> <li>- baseline</li> <li>- 9-months-follow-up (after treatment)</li> </ul>         | manualized brief psychodynamic-interpersonal therapy (PIT) consisting of 12 individual sessions (establishment of therapeutic alliance, treatment of somatoform symptoms, behavioral, emotional, and interpersonal correlates, termination issues) | <ul style="list-style-type: none"> <li>- TAS-20</li> <li>- SF-36</li> <li>- HAQ</li> <li>- PHQ-9</li> </ul>                   | <ul style="list-style-type: none"> <li>- TAS-20 scores were significantly positively associated with PHQ-9</li> <li>- interaction effect between patients' alliance ratings and patients' alexithymia on physical quality of life at 9-month after treatment did not attain statistical significance, even after controlling for depression</li> <li>- interaction effect between the therapists' alliance ratings and patients' alexithymia on physical quality of life at 9-month after PIT reached statistical significance, after controlling for depression this interaction effect did not reach significance</li> </ul> |
| 8 | Saedi, Hatami, Asgari, Ahadi and Poursharifi [125]                     | The Effectiveness of Cognitive-Behavioral Therapy on Alexithymia and Pain. Self-Efficacy of Patients with Chronic Pain                                                             | <ul style="list-style-type: none"> <li>- Baseline</li> <li>- Post-treatment</li> <li>- 3-months-follow-up</li> </ul> | behavioral-cognitive training consisting of 8 sessions of 90 minutes                                                                                                                                                                               | <ul style="list-style-type: none"> <li>- Case-finding chronic pain questionnaire</li> <li>- TAS-20</li> <li>- PSEQ</li> </ul> | <ul style="list-style-type: none"> <li>- significant difference between patients within CBT and control group in terms of alexithymia and pain self-efficacy [<math>p \leq 0.001</math>]</li> <li>- CBT led to increased self-efficacy of pain, reduced alexithymia, and harmful effects of pain</li> </ul>                                                                                                                                                                                                                                                                                                                    |

---
