# Supplementary material for: Alexithymia in Patients with Somatization Difficulties and Tinnitus-Related Distress: A Systematic Review
Source: MDPI journal article supplement (doi:10.3390/jcm12216828), 2023-10-29
Supplement: s1 [file s1]

**Supplementary Table S2.** Overview of Included Studies focusing on Alexithymia and Chronic Tinnitus

| I<br>D | Author(s)<br>& Year                                                                        | Title                                                                                                                  | Outcome<br>measurement                                                                                 | Study outcome                                                                                                                                                                                                                                                                                                                                                                                                                                |
|--------|--------------------------------------------------------------------------------------------|------------------------------------------------------------------------------------------------------------------------|--------------------------------------------------------------------------------------------------------|----------------------------------------------------------------------------------------------------------------------------------------------------------------------------------------------------------------------------------------------------------------------------------------------------------------------------------------------------------------------------------------------------------------------------------------------|
| 1      | Bakhla,<br>Dayal,<br>Bala and<br>Toppo<br>[112]                                            | Auditory<br>sensation with<br>affective<br>agnosia: A<br>prevalence of<br>alexithymia<br>among<br>tinnitus<br>patients | - TAS-20<br>- THI<br>- HADS-A<br>- HADS-D                                                              | - prevalence of tinnitus-related<br>distress: slight (10%), mild (17.1%),<br>moderate (20%), severe (34.3%) and<br>catastrophic (18.6%)<br>- prevalence of alexithymia in<br>patients suffering from tinnitus =<br>65.7%<br>- subgroup categorized as high THI<br>significantly scored higher on TAS-<br>20, DIF, DDF but not EOT and<br>higher on depression and anxiety                                                                    |
| 2      | Salonen,<br>Johansson<br>and<br>Joukamaa<br>[114]                                          | Alexithymia,<br>depression<br>and tinnitus in<br>elderly people                                                        | - TAS-20<br>- BDI<br>- <i>Individual</i><br>Tinnitus<br>Questionnaire<br>- Audiometric<br>measurements | - severity of alexithymia was<br>associated with presence of tinnitus<br>- TAS-20 did not correlate with<br>tinnitus severity (categorized as<br>patients with or without annoyance<br>due to tinnitus)<br>- patients with tinnitus but without<br>annoyance were most commonly<br>alexithymic and scored the highest<br>on TAS-20<br>- patients with annoying tinnitus<br>were more commonly alexithymic<br>than subjects without tinnitus  |
| 3      | Wielopols<br>ki,<br>Kleijnung,<br>Koch,<br>Peter,<br>Meyer,<br>Rufer and<br>Weidt<br>[113] | Alexithymia Is<br>Associated<br>with Tinnitus<br>Severity                                                              | - TAS-20<br>- THI<br>- BDI                                                                             | - prevalence of tinnitus-related<br>distress: slight (12.6%), mild (29%),<br>moderate (28%), severe (21.7%) and<br>catastrophic (8.7%)<br>- THI and its subscales (functional,<br>emotional, catastrophic) were<br>significantly associated with TAS-<br>20, DIF and DDF but not EOT<br>- significant prediction of tinnitus-<br>related distress by DIF and BDI<br>- THI functional subscale<br>independently associated with<br>higher DIF |
