# Supplementary material for: Alexithymia in Patients with Somatization Difficulties and Tinnitus-Related Distress: A Systematic Review
Source: MDPI journal article supplement (doi:10.3390/jcm12216828), 2023-10-29
Supplement: s1 [file s1]

**Supplementary Table S4.** Assessment of risk of bias for Non-RCTs focusing on Alexithymia and Somatization

| Reference                                                | Domain                                           | Signaling question                                                                                                                                                                                                                                                                                                              | Response |
|----------------------------------------------------------|--------------------------------------------------|---------------------------------------------------------------------------------------------------------------------------------------------------------------------------------------------------------------------------------------------------------------------------------------------------------------------------------|----------|
| Aboussouan, Mandell, Johnson, Thompson and Huffman [128] | Bias due to confounding                          | 1.1 Is there potential for confounding of the effect of intervention in this study?<br>If N/PN to 1.1: the study can be considered to be at low risk of bias due to confounding and no further signalling questions need be considered<br>If Y/PY to 1.1: determine whether there is a need to assess time-varying confounding: | Y        |
|                                                          |                                                  | 1.2 Was the analysis based on splitting participants' follow up time according to intervention received?<br>If N/PN, answer questions relating to baseline confounding (1.4 to 1.6)<br>If Y/PY, go to question 1.3.                                                                                                             | N        |
|                                                          |                                                  | 1.3 Were intervention discontinuations or switches likely to be related to factors that are prognostic for the outcome?<br>If N/PN, answer questions relating to baseline confounding (1.4 to 1.6)<br>If Y/PY, answer questions relating to both baseline and time-varying confounding (1.7 and 1.8)                            | NA       |
|                                                          |                                                  | 1.4. Did the authors use an appropriate analysis method that controlled for all the important confounding domains?                                                                                                                                                                                                              | Y        |
|                                                          |                                                  | 1.5. If Y/PY to 1.4: Were confounding domains that were controlled for measured validly and reliably by the variables available in this study?                                                                                                                                                                                  | PY       |
|                                                          |                                                  | 1.6. Did the authors control for any post-intervention variables that could have been affected by the intervention?                                                                                                                                                                                                             | N        |
|                                                          |                                                  | 1.7. Did the authors use an appropriate analysis method that controlled for all the important confounding domains and for time-varying confounding?                                                                                                                                                                             | Y        |
|                                                          |                                                  | 1.8. If Y/PY to 1.7: Were confounding domains that were controlled for measured validly and reliably by the variables available in this study?                                                                                                                                                                                  | Y        |
|                                                          |                                                  | Risk of bias judgement                                                                                                                                                                                                                                                                                                          | Moderate |
|                                                          | Bias in selection of participants into the study | 2.1. Was selection of participants into the study (or into the analysis) based on participant characteristics observed after the start of intervention?                                                                                                                                                                         | N        |
|                                                          |                                                  | 2.2. If Y/PY to 2.1: Were the post-intervention variables that influenced selection likely to be associated with intervention?                                                                                                                                                                                                  | NA       |
|                                                          |                                                  | 2.3. If Y/PY to 2.2: Were the post-intervention variables that influenced selection likely to be influenced by the outcome or a cause of the outcome?                                                                                                                                                                           | NA       |
|                                                          |                                                  | 2.4. Do start of follow-up and start of intervention coincide for most participants?                                                                                                                                                                                                                                            | Y        |
|                                                          |                                                  | 2.5. If Y/PY to 2.2 and 2.3, or N/PN to 2.4: Were adjustment techniques used that are likely to correct for the presence of selection biases?                                                                                                                                                                                   | NA       |
|                                                          |                                                  | Risk of bias judgement                                                                                                                                                                                                                                                                                                          | Low      |
|                                                          | Bias in classification                           | 3.1. Were intervention groups clearly defined?                                                                                                                                                                                                                                                                                  | Y        |
|                                                          |                                                  | 3.2. Was the information used to define intervention groups recorded at the start of the intervention?                                                                                                                                                                                                                          | Y        |
|                                                          |                                                  | 3.3. Could classification of intervention status have been affected by knowledge of the outcome or risk of the outcome?                                                                                                                                                                                                         | PN       |

|                  |                                                    |                                                                                                                                                                                                                                        |          |
|------------------|----------------------------------------------------|----------------------------------------------------------------------------------------------------------------------------------------------------------------------------------------------------------------------------------------|----------|
|                  | of interventions                                   | Risk of bias judgement                                                                                                                                                                                                                 | Low      |
|                  |                                                    | 4.1. Were there deviations from the intended intervention beyond what would be expected in usual practice?                                                                                                                             | N        |
|                  |                                                    | 4.2. If Y/PY to 4.1: Were these deviations from intended intervention unbalanced between groups and likely to have affected the outcome?                                                                                               | NA       |
|                  | Bias due to deviations from intended interventions | If your aim for this study is to assess the effect of starting and adhering to intervention, answer questions 4.3 to 4.6                                                                                                               |          |
|                  |                                                    | 4.3. Were important co-interventions balanced across intervention groups?                                                                                                                                                              | NA       |
|                  |                                                    | 4.4. Was the intervention implemented successfully for most participants?                                                                                                                                                              | NA       |
|                  |                                                    | 4.5. Did study participants adhere to the assigned intervention regimen?                                                                                                                                                               | NA       |
|                  |                                                    | 4.6. If N/PN to 4.3, 4.4 or 4.5: Was an appropriate analysis used to estimate the effect of starting and adhering to the intervention?                                                                                                 | NA       |
|                  |                                                    | Risk of bias judgement                                                                                                                                                                                                                 | Low      |
|                  |                                                    | 5.1. Were outcome data available for all, or nearly all, participants?                                                                                                                                                                 | Y        |
|                  |                                                    | 5.2. Were participants excluded due to missing data on intervention status?                                                                                                                                                            | Y        |
|                  |                                                    | 5.3. Were participants excluded due to missing data on other variables needed for the analysis?                                                                                                                                        | Y        |
|                  | Bias due to missing data                           | 5.4. If PN/N to 5.1, or Y/PY to 5.2 or 5.3: Are the proportion of participants and reasons for missing data similar across interventions?                                                                                              | PY       |
|                  |                                                    | 5.5. If PN/N to 5.1, or Y/PY to 5.2 or 5.3: Is there evidence that results were robust to the presence of missing data?                                                                                                                | NI       |
|                  |                                                    | Risk of bias judgement                                                                                                                                                                                                                 | Moderate |
|                  |                                                    | 6.1. Could the outcome measure have been influenced by knowledge of the intervention received?                                                                                                                                         | PN       |
|                  | Bias in measurement of outcomes                    | 6.2. Were outcome assessors aware of the intervention received by study participants?                                                                                                                                                  | Y        |
|                  |                                                    | 6.3. Were the methods of outcome assessment comparable across intervention groups?                                                                                                                                                     | Y        |
|                  |                                                    | 6.4. Were any systematic errors in measurement of the outcome related to intervention received?                                                                                                                                        | PN       |
|                  |                                                    | Risk of bias judgement                                                                                                                                                                                                                 | Moderate |
|                  |                                                    | Is the reported effect estimate likely to be selected, on the basis of the results, from...                                                                                                                                            |          |
|                  | Bias in selection of the reported result           | 7.1. ... multiple outcome measurements within the outcome domain?                                                                                                                                                                      | PN       |
|                  |                                                    | 7.2. ... multiple analyses of the intervention-outcome relationship?                                                                                                                                                                   | PN       |
|                  |                                                    | 7.3. ... different subgroups?                                                                                                                                                                                                          | PN       |
|                  |                                                    | Risk of bias judgement                                                                                                                                                                                                                 | Low      |
|                  | <b>Overall bias</b>                                | Risk of bias judgement                                                                                                                                                                                                                 | Moderate |
| Melin, Thulesius | Bias due to confounding                            | 1.1 Is there potential for confounding of the effect of intervention in this study?<br>If N/PN to 1.1: the study can be considered to be at low risk of bias due to confounding and no further signalling questions need be considered | Y        |

and Persson  
[76]

|                                                    |                                                                                                                                                         |          |
|----------------------------------------------------|---------------------------------------------------------------------------------------------------------------------------------------------------------|----------|
|                                                    | If Y/PY to 1.1: determine whether there is a need to assess time-varying confounding:                                                                   |          |
|                                                    | 1.2 Was the analysis based on splitting participants' follow up time according to intervention received?                                                | N        |
|                                                    | If N/PN, answer questions relating to baseline confounding (1.4 to 1.6)                                                                                 |          |
|                                                    | If Y/PY, go to question 1.3.                                                                                                                            |          |
|                                                    | 1.3 Were intervention discontinuations or switches likely to be related to factors that are prognostic for the outcome?                                 | NA       |
|                                                    | If N/PN, answer questions relating to baseline confounding (1.4 to 1.6)                                                                                 |          |
|                                                    | If Y/PY, answer questions relating to both baseline and time-varying confounding (1.7 and 1.8)                                                          |          |
|                                                    | 1.4. Did the authors use an appropriate analysis method that controlled for all the important confounding domains?                                      | Y        |
|                                                    | 1.5. If Y/PY to 1.4: Were confounding domains that were controlled for measured validly and reliably by the variables available in this study?          | Y        |
|                                                    | 1.6. Did the authors control for any post-intervention variables that could have been affected by the intervention?                                     | Y        |
|                                                    | 1.7. Did the authors use an appropriate analysis method that controlled for all the important confounding domains and for time-varying confounding?     | Y        |
|                                                    | 1.8. If Y/PY to 1.7: Were confounding domains that were controlled for measured validly and reliably by the variables available in this study?          | Y        |
|                                                    | Risk of bias judgement                                                                                                                                  | Moderate |
| Bias in selection of participants into the study   | 2.1. Was selection of participants into the study (or into the analysis) based on participant characteristics observed after the start of intervention? | N        |
|                                                    | 2.2. If Y/PY to 2.1: Were the post-intervention variables that influenced selection likely to be associated with intervention?                          | NA       |
|                                                    | 2.3. If Y/PY to 2.2: Were the post-intervention variables that influenced selection likely to be influenced by the outcome or a cause of the outcome?   | NA       |
|                                                    | 2.4. Do start of follow-up and start of intervention coincide for most participants?                                                                    | Y        |
|                                                    | 2.5. If Y/PY to 2.2 and 2.3, or N/PN to 2.4: Were adjustment techniques used that are likely to correct for the presence of selection biases?           | NA       |
|                                                    | Risk of bias judgement                                                                                                                                  | Low      |
| Bias in classification of interventions            | 3.1. Were intervention groups clearly defined?                                                                                                          | Y        |
|                                                    | 3.2. Was the information used to define intervention groups recorded at the start of the intervention?                                                  | Y        |
|                                                    | 3.3. Could classification of intervention status have been affected by knowledge of the outcome or risk of the outcome?                                 | PN       |
|                                                    | Risk of bias judgement                                                                                                                                  | Low      |
| Bias due to deviations from intended interventions | 4.1. Were there deviations from the intended intervention beyond what would be expected in usual practice?                                              | N        |
|                                                    | 4.2. If Y/PY to 4.1: Were these deviations from intended intervention unbalanced between groups and likely to have affected the outcome?                | NA       |
|                                                    | If your aim for this study is to assess the effect of starting and adhering to intervention, answer questions 4.3 to 4.6                                |          |
|                                                    | 4.3. Were important co-interventions balanced across intervention groups?                                                                               | NA       |

|                                                          |                                                                                                                                                 |          |
|----------------------------------------------------------|-------------------------------------------------------------------------------------------------------------------------------------------------|----------|
|                                                          | 4.4. Was the intervention implemented successfully for most participants?                                                                       | NA       |
|                                                          | 4.5. Did study participants adhere to the assigned intervention regimen?                                                                        | NA       |
|                                                          | 4.6. If N/PN to 4.3, 4.4 or 4.5: Was an appropriate analysis used to estimate the effect of starting and adhering to the intervention?          | NA       |
|                                                          | Risk of bias judgement                                                                                                                          | Low      |
| Bias due to missing data                                 | 5.1. Were outcome data available for all, or nearly all, participants?                                                                          | PN       |
|                                                          | 5.2. Were participants excluded due to missing data on intervention status?                                                                     | PY       |
|                                                          | 5.3. Were participants excluded due to missing data on other variables needed for the analysis?                                                 | PN       |
|                                                          | 5.4. If PN/N to 5.1, or Y/PY to 5.2 or 5.3: Are the proportion of participants and reasons for missing data similar across interventions?       | NI       |
|                                                          | 5.5. If PN/N to 5.1, or Y/PY to 5.2 or 5.3: Is there evidence that results were robust to the presence of missing data?                         | NI       |
|                                                          | Risk of bias judgement                                                                                                                          | Serious  |
| Bias in measurement of outcomes                          | 6.1. Could the outcome measure have been influenced by knowledge of the intervention received?                                                  | PN       |
|                                                          | 6.2. Were outcome assessors aware of the intervention received by study participants?                                                           | Y        |
|                                                          | 6.3. Were the methods of outcome assessment comparable across intervention groups?                                                              | Y        |
|                                                          | 6.4. Were any systematic errors in measurement of the outcome related to intervention received?                                                 | PN       |
|                                                          | Risk of bias judgement                                                                                                                          | Moderate |
| Bias in selection of the reported result                 | Is the reported effect estimate likely to be selected, on the basis of the results, from...                                                     |          |
|                                                          | 7.1. ... multiple outcome measurements within the outcome domain?                                                                               | PN       |
|                                                          | 7.2. ... multiple analyses of the intervention-outcome relationship?                                                                            | PN       |
|                                                          | 7.3. ... different subgroups?                                                                                                                   | PN       |
|                                                          | Risk of bias judgement                                                                                                                          | Low      |
| Overall bias                                             | Risk of bias judgement                                                                                                                          | Moderate |
| Saariaho, Saariaho, Mattila, Joukamaa and Karukivi [129] | 1.1 Is there potential for confounding of the effect of intervention in this study?                                                             | Y        |
|                                                          | If N/PN to 1.1: the study can be considered to be at low risk of bias due to confounding and no further signalling questions need be considered |          |
|                                                          | If Y/PY to 1.1: determine whether there is a need to assess time-varying confounding:                                                           |          |
|                                                          | 1.2 Was the analysis based on splitting participants' follow up time according to intervention received?                                        | N        |
|                                                          | If N/PN, answer questions relating to baseline confounding (1.4 to 1.6)                                                                         |          |
|                                                          | If Y/PY, go to question 1.3.                                                                                                                    |          |
|                                                          | 1.3 Were intervention discontinuations or switches likely to be related to factors that are prognostic for the outcome?                         | NA       |
|                                                          | If N/PN, answer questions relating to baseline confounding (1.4 to 1.6)                                                                         |          |
|                                                          | If Y/PY, answer questions relating to both baseline and time-varying confounding (1.7 and 1.8)                                                  |          |

|                                                    |                                                                                                                                                         |          |
|----------------------------------------------------|---------------------------------------------------------------------------------------------------------------------------------------------------------|----------|
|                                                    | 1.4. Did the authors use an appropriate analysis method that controlled for all the important confounding domains?                                      | PY       |
|                                                    | 1.5. If Y/PY to 1.4: Were confounding domains that were controlled for measured validly and reliably by the variables available in this study?          | PY       |
|                                                    | 1.6. Did the authors control for any post-intervention variables that could have been affected by the intervention?                                     | N        |
|                                                    | 1.7. Did the authors use an appropriate analysis method that controlled for all the important confounding domains and for time-varying confounding?     | Y        |
|                                                    | 1.8. If Y/PY to 1.7: Were confounding domains that were controlled for measured validly and reliably by the variables available in this study?          | PY       |
|                                                    | Risk of bias judgement                                                                                                                                  | Low      |
| Bias in selection of participants into the study   | 2.1. Was selection of participants into the study (or into the analysis) based on participant characteristics observed after the start of intervention? | N        |
|                                                    | 2.2. If Y/PY to 2.1: Were the post-intervention variables that influenced selection likely to be associated with intervention?                          | NA       |
|                                                    | 2.3. If Y/PY to 2.2: Were the post-intervention variables that influenced selection likely to be influenced by the outcome or a cause of the outcome?   | NA       |
|                                                    | 2.4. Do start of follow-up and start of intervention coincide for most participants?                                                                    | Y        |
|                                                    | 2.5. If Y/PY to 2.2 and 2.3, or N/PN to 2.4: Were adjustment techniques used that are likely to correct for the presence of selection biases?           | NA       |
|                                                    | Risk of bias judgement                                                                                                                                  | Low      |
| Bias in classification of interventions            | 3.1. Were intervention groups clearly defined?                                                                                                          | PN       |
|                                                    | 3.2. Was the information used to define intervention groups recorded at the start of the intervention?                                                  | PN       |
|                                                    | 3.3. Could classification of intervention status have been affected by knowledge of the outcome or risk of the outcome?                                 | PN       |
|                                                    | Risk of bias judgement                                                                                                                                  | Critical |
| Bias due to deviations from intended interventions | 4.1. Were there deviations from the intended intervention beyond what would be expected in usual practice?                                              | N        |
|                                                    | 4.2. If Y/PY to 4.1: Were these deviations from intended intervention unbalanced between groups and likely to have affected the outcome?                | NA       |
|                                                    | If your aim for this study is to assess the effect of starting and adhering to intervention, answer questions 4.3 to 4.6                                |          |
|                                                    | 4.3. Were important co-interventions balanced across intervention groups?                                                                               | NA       |
|                                                    | 4.4. Was the intervention implemented successfully for most participants?                                                                               | NA       |
|                                                    | 4.5. Did study participants adhere to the assigned intervention regimen?                                                                                | NA       |
|                                                    | 4.6. If N/PN to 4.3, 4.4 or 4.5: Was an appropriate analysis used to estimate the effect of starting and adhering to the intervention?                  | NA       |
|                                                    | Risk of bias judgement                                                                                                                                  | Low      |
| Bias due to missing data                           | 5.1. Were outcome data available for all, or nearly all, participants?                                                                                  | N        |
|                                                    | 5.2. Were participants excluded due to missing data on intervention status?                                                                             | Y        |

|                                                                   |                                                                                                                                                     |          |
|-------------------------------------------------------------------|-----------------------------------------------------------------------------------------------------------------------------------------------------|----------|
|                                                                   | 5.3. Were participants excluded due to missing data on other variables needed for the analysis?                                                     | N        |
|                                                                   | 5.4. If PN/N to 5.1, or Y/PY to 5.2 or 5.3: Are the proportion of participants and reasons for missing data similar across interventions?           | PY       |
|                                                                   | 5.5. If PN/N to 5.1, or Y/PY to 5.2 or 5.3: Is there evidence that results were robust to the presence of missing data?                             | Y        |
|                                                                   | Risk of bias judgement                                                                                                                              | Moderate |
| Bias in measurement of outcomes                                   | 6.1. Could the outcome measure have been influenced by knowledge of the intervention received?                                                      | PN       |
|                                                                   | 6.2. Were outcome assessors aware of the intervention received by study participants?                                                               | Y        |
|                                                                   | 6.3. Were the methods of outcome assessment comparable across intervention groups?                                                                  | Y        |
|                                                                   | 6.4. Were any systematic errors in measurement of the outcome related to intervention received?                                                     | PN       |
|                                                                   | Risk of bias judgement                                                                                                                              | Moderate |
| Bias in selection of the reported result                          | Is the reported effect estimate likely to be selected, on the basis of the results, from...                                                         |          |
|                                                                   | 7.1. ... multiple outcome measurements within the outcome domain?                                                                                   | PN       |
|                                                                   | 7.2. ... multiple analyses of the intervention-outcome relationship?                                                                                | PN       |
|                                                                   | 7.3. ... different subgroups?                                                                                                                       | PY       |
|                                                                   | Risk of bias judgement                                                                                                                              | Moderate |
| Overall bias                                                      | Risk of bias judgement                                                                                                                              | Moderate |
| Saariaho, Saariaho, Mattila, Ohtonen, Joukamaa and Karukivi [130] | 1.1 Is there potential for confounding of the effect of intervention in this study?                                                                 | Y        |
|                                                                   | If N/PN to 1.1: the study can be considered to be at low risk of bias due to confounding and no further signalling questions need be considered     |          |
|                                                                   | If Y/PY to 1.1: determine whether there is a need to assess time-varying confounding:                                                               |          |
|                                                                   | 1.2 Was the analysis based on splitting participants' follow up time according to intervention received?                                            | N        |
|                                                                   | If N/PN, answer questions relating to baseline confounding (1.4 to 1.6)                                                                             |          |
|                                                                   | If Y/PY, go to question 1.3.                                                                                                                        |          |
|                                                                   | 1.3 Were intervention discontinuations or switches likely to be related to factors that are prognostic for the outcome?                             | NA       |
|                                                                   | If N/PN, answer questions relating to baseline confounding (1.4 to 1.6)                                                                             |          |
|                                                                   | If Y/PY, answer questions relating to both baseline and time-varying confounding (1.7 and 1.8)                                                      |          |
|                                                                   | 1.4. Did the authors use an appropriate analysis method that controlled for all the important confounding domains?                                  | PY       |
|                                                                   | 1.5. If Y/PY to 1.4: Were confounding domains that were controlled for measured validly and reliably by the variables available in this study?      | PY       |
|                                                                   | 1.6. Did the authors control for any post-intervention variables that could have been affected by the intervention?                                 | N        |
| Bias due to confounding                                           | 1.7. Did the authors use an appropriate analysis method that controlled for all the important confounding domains and for time-varying confounding? | Y        |
|                                                                   | 1.8. If Y/PY to 1.7: Were confounding domains that were controlled for measured validly and reliably by the variables available in this study?      | PY       |

|                                                    |                                                                                                                                                         |          |
|----------------------------------------------------|---------------------------------------------------------------------------------------------------------------------------------------------------------|----------|
|                                                    | Risk of bias judgement                                                                                                                                  | Low      |
| Bias in selection of participants into the study   | 2.1. Was selection of participants into the study (or into the analysis) based on participant characteristics observed after the start of intervention? | N        |
|                                                    | 2.2. If Y/PY to 2.1: Were the post-intervention variables that influenced selection likely to be associated with intervention?                          | NA       |
|                                                    | 2.3. If Y/PY to 2.2: Were the post-intervention variables that influenced selection likely to be influenced by the outcome or a cause of the outcome?   | NA       |
|                                                    | 2.4. Do start of follow-up and start of intervention coincide for most participants?                                                                    | PY       |
|                                                    | 2.5. If Y/PY to 2.2 and 2.3, or N/PN to 2.4: Were adjustment techniques used that are likely to correct for the presence of selection biases?           | NA       |
|                                                    | Risk of bias judgement                                                                                                                                  | Low      |
| Bias in classification of interventions            | 3.1. Were intervention groups clearly defined?                                                                                                          | PN       |
|                                                    | 3.2. Was the information used to define intervention groups recorded at the start of the intervention?                                                  | PN       |
|                                                    | 3.3. Could classification of intervention status have been affected by knowledge of the outcome or risk of the outcome?                                 | PN       |
|                                                    | Risk of bias judgement                                                                                                                                  | Critical |
| Bias due to deviations from intended interventions | 4.1. Were there deviations from the intended intervention beyond what would be expected in usual practice?                                              | PN       |
|                                                    | 4.2. If Y/PY to 4.1: Were these deviations from intended intervention unbalanced between groups and likely to have affected the outcome?                | NA       |
|                                                    | If your aim for this study is to assess the effect of starting and adhering to intervention, answer questions 4.3 to 4.6                                |          |
|                                                    | 4.3. Were important co-interventions balanced across intervention groups?                                                                               | NA       |
|                                                    | 4.4. Was the intervention implemented successfully for most participants?                                                                               | NA       |
|                                                    | 4.5. Did study participants adhere to the assigned intervention regimen?                                                                                | NA       |
|                                                    | 4.6. If N/PN to 4.3, 4.4 or 4.5: Was an appropriate analysis used to estimate the effect of starting and adhering to the intervention?                  | NA       |
|                                                    | Risk of bias judgement                                                                                                                                  | Low      |
| Bias due to missing data                           | 5.1. Were outcome data available for all, or nearly all, participants?                                                                                  | N        |
|                                                    | 5.2. Were participants excluded due to missing data on intervention status?                                                                             | Y        |
|                                                    | 5.3. Were participants excluded due to missing data on other variables needed for the analysis?                                                         | N        |
|                                                    | 5.4. If PN/N to 5.1, or Y/PY to 5.2 or 5.3: Are the proportion of participants and reasons for missing data similar across interventions?               | PY       |
|                                                    | 5.5. If PN/N to 5.1, or Y/PY to 5.2 or 5.3: Is there evidence that results were robust to the presence of missing data?                                 | Y        |
|                                                    | Risk of bias judgement                                                                                                                                  | Moderate |
| Bias in measurement of outcomes                    | 6.1. Could the outcome measure have been influenced by knowledge of the intervention received?                                                          | PY       |
|                                                    | 6.2. Were outcome assessors aware of the intervention received by study participants?                                                                   | Y        |
|                                                    | 6.3. Were the methods of outcome assessment comparable across intervention groups?                                                                      | Y        |

|                                                                |                                                                                                                                                         |          |
|----------------------------------------------------------------|---------------------------------------------------------------------------------------------------------------------------------------------------------|----------|
|                                                                | 6.4. Were any systematic errors in measurement of the outcome related to intervention received?                                                         | N        |
|                                                                | Risk of bias judgement                                                                                                                                  | Moderate |
| Bias in selection of the reported result                       | Is the reported effect estimate likely to be selected, on the basis of the results, from...                                                             |          |
|                                                                | 7.1. ... multiple outcome measurements within the outcome domain?                                                                                       | PN       |
|                                                                | 7.2. ... multiple analyses of the intervention-outcome relationship?                                                                                    | PN       |
|                                                                | 7.3. ... different subgroups?                                                                                                                           | PY       |
|                                                                | Risk of bias judgement                                                                                                                                  | Moderate |
| Overall bias                                                   | Risk of bias judgement                                                                                                                                  | Moderate |
| Porcelli, Bagby, Taylor, De Carne, Leandro and Todarello [131] | 1.1 Is there potential for confounding of the effect of intervention in this study?                                                                     | Y        |
|                                                                | If N/PN to 1.1: the study can be considered to be at low risk of bias due to confounding and no further signalling questions need be considered         |          |
|                                                                | If Y/PY to 1.1: determine whether there is a need to assess time-varying confounding:                                                                   |          |
|                                                                | 1.2 Was the analysis based on splitting participants' follow up time according to intervention received?                                                | N        |
|                                                                | If N/PN, answer questions relating to baseline confounding (1.4 to 1.6)                                                                                 |          |
|                                                                | If Y/PY, go to question 1.3.                                                                                                                            |          |
|                                                                | 1.3 Were intervention discontinuations or switches likely to be related to factors that are prognostic for the outcome?                                 | NA       |
|                                                                | If N/PN, answer questions relating to baseline confounding (1.4 to 1.6)                                                                                 |          |
|                                                                | If Y/PY, answer questions relating to both baseline and time-varying confounding (1.7 and 1.8)                                                          |          |
|                                                                | 1.4. Did the authors use an appropriate analysis method that controlled for all the important confounding domains?                                      | Y        |
|                                                                | 1.5. If Y/PY to 1.4: Were confounding domains that were controlled for measured validly and reliably by the variables available in this study?          | PY       |
|                                                                | 1.6. Did the authors control for any post-intervention variables that could have been affected by the intervention?                                     | N        |
|                                                                | 1.7. Did the authors use an appropriate analysis method that controlled for all the important confounding domains and for time-varying confounding?     | Y        |
|                                                                | 1.8. If Y/PY to 1.7: Were confounding domains that were controlled for measured validly and reliably by the variables available in this study?          | PY       |
|                                                                | Risk of bias judgement                                                                                                                                  | Moderate |
| Bias in selection of participants into the study               | 2.1. Was selection of participants into the study (or into the analysis) based on participant characteristics observed after the start of intervention? | N        |
|                                                                | 2.2. If Y/PY to 2.1: Were the post-intervention variables that influenced selection likely to be associated with intervention?                          | NA       |
|                                                                | 2.3. If Y/PY to 2.2: Were the post-intervention variables that influenced selection likely to be influenced by the outcome or a cause of the outcome?   | NA       |
|                                                                | 2.4. Do start of follow-up and start of intervention coincide for most participants?                                                                    | Y        |



|                                                    |                                                                                                                                               |          |
|----------------------------------------------------|-----------------------------------------------------------------------------------------------------------------------------------------------|----------|
|                                                    | 2.5. If Y/PY to 2.2 and 2.3, or N/PN to 2.4: Were adjustment techniques used that are likely to correct for the presence of selection biases? | NA       |
|                                                    | Risk of bias judgement                                                                                                                        | Low      |
| Bias in classification of interventions            | 3.1. Were intervention groups clearly defined?                                                                                                | Y        |
|                                                    | 3.2. Was the information used to define intervention groups recorded at the start of the intervention?                                        | Y        |
|                                                    | 3.3. Could classification of intervention status have been affected by knowledge of the outcome or risk of the outcome?                       | PN       |
|                                                    | Risk of bias judgement                                                                                                                        | Low      |
| Bias due to deviations from intended interventions | 4.1. Were there deviations from the intended intervention beyond what would be expected in usual practice?                                    | PN       |
|                                                    | 4.2. If Y/PY to 4.1: Were these deviations from intended intervention unbalanced between groups and likely to have affected the outcome?      | NA       |
|                                                    | If your aim for this study is to assess the effect of starting and adhering to intervention, answer questions 4.3 to 4.6                      |          |
|                                                    | 4.3. Were important co-interventions balanced across intervention groups?                                                                     | NA       |
|                                                    | 4.4. Was the intervention implemented successfully for most participants?                                                                     | NA       |
|                                                    | 4.5. Did study participants adhere to the assigned intervention regimen?                                                                      | NA       |
|                                                    | 4.6. If N/PN to 4.3, 4.4 or 4.5: Was an appropriate analysis used to estimate the effect of starting and adhering to the intervention?        | NA       |
|                                                    | Risk of bias judgement                                                                                                                        | Low      |
| Bias due to missing data                           | 5.1. Were outcome data available for all, or nearly all, participants?                                                                        | PN       |
|                                                    | 5.2. Were participants excluded due to missing data on intervention status?                                                                   | PY       |
|                                                    | 5.3. Were participants excluded due to missing data on other variables needed for the analysis?                                               | PN       |
|                                                    | 5.4. If PN/N to 5.1, or Y/PY to 5.2 or 5.3: Are the proportion of participants and reasons for missing data similar across interventions?     | PY       |
|                                                    | 5.5. If PN/N to 5.1, or Y/PY to 5.2 or 5.3: Is there evidence that results were robust to the presence of missing data?                       | NI       |
|                                                    | Risk of bias judgement                                                                                                                        | Moderate |
| Bias in measurement of outcomes                    | 6.1. Could the outcome measure have been influenced by knowledge of the intervention received?                                                | PN       |
|                                                    | 6.2. Were outcome assessors aware of the intervention received by study participants?                                                         | Y        |
|                                                    | 6.3. Were the methods of outcome assessment comparable across intervention groups?                                                            | Y        |
|                                                    | 6.4. Were any systematic errors in measurement of the outcome related to intervention received?                                               | PN       |
|                                                    | Risk of bias judgement                                                                                                                        | Moderate |
| Bias in selection of the reported result           | Is the reported effect estimate likely to be selected, on the basis of the results, from...                                                   |          |
|                                                    | 7.1. ... multiple outcome measurements within the outcome domain?                                                                             | PN       |
|                                                    | 7.2. ... multiple analyses of the intervention-outcome relationship?                                                                          | PN       |
|                                                    | 7.3. ... different subgroups?                                                                                                                 | Y        |

|              |                        |          |
|--------------|------------------------|----------|
|              | Risk of bias judgement | Moderate |
| Overall bias | Risk of bias judgement | Moderate |

Y: yes; PY: probably yes; PN: probably no; N: no; NI: no information; NA: no answer.
