# Supplementary material for: Alexithymia in Patients with Somatization Difficulties and Tinnitus-Related Distress: A Systematic Review
Source: MDPI journal article supplement (doi:10.3390/jcm12216828), 2023-10-29
Supplement: s1 [file s1]

**Supplementary Table S3.** Assessment of risk of bias for RCTs focusing on Alexithymia and Somatization

| Reference            | Domain                                             | Signaling question                                                                                                                                                                  | Response      |
|----------------------|----------------------------------------------------|-------------------------------------------------------------------------------------------------------------------------------------------------------------------------------------|---------------|
| Probst et al. (2017) | Bias arising from the randomization process        | 1.1 Was the allocation sequence random?                                                                                                                                             | Y             |
|                      |                                                    | 1.2 Was the allocation sequence concealed until participants were enrolled and assigned to interventions?                                                                           | NI            |
|                      |                                                    | 1.3 Did baseline differences between intervention groups suggest a problem with the randomization process?                                                                          | NI            |
|                      |                                                    | Risk of bias judgement                                                                                                                                                              | Some concerns |
|                      | Bias due to deviations from intended interventions | 2.1. Were participants aware of their assigned intervention during the trial?                                                                                                       | NI            |
|                      |                                                    | 2.2. Were carers and people delivering the interventions aware of participants' assigned intervention during the trial?                                                             | Y             |
|                      |                                                    | 2.3. If Y/PY/NI to 2.1 or 2.2: Were there deviations from the intended intervention that arose because of the experimental context?                                                 | N             |
|                      |                                                    | 2.4 If Y/PY to 2.3: Were these deviations likely to have affected the outcome?                                                                                                      | NA            |
|                      |                                                    | 2.5. If Y/PY/NI to 2.4: Were these deviations from intended intervention balanced between groups?                                                                                   | NA            |
|                      |                                                    | 2.6 Was an appropriate analysis used to estimate the effect of assignment to intervention?                                                                                          | PY            |
|                      |                                                    | 2.7 If N/PN/NI to 2.6: Was there potential for a substantial impact (on the result) of the failure to analyse participants in the group to which they were randomized?              | NA            |
|                      |                                                    | Risk of bias judgement                                                                                                                                                              | Low           |
|                      | Bias due to missing outcome data                   | 3.1 Were data for this outcome available for all, or nearly all, participants randomized?                                                                                           | PY            |
|                      |                                                    | 3.2 If N/PN/NI to 3.1: Is there evidence that result was not biased by missing outcome data?                                                                                        | NA            |
|                      |                                                    | 3.3 If N/PN to 3.2: Could missingness in the outcome depend on its true value?                                                                                                      | NA            |
|                      |                                                    | 3.4 If Y/PY/NI to 3.3: Is it likely that missingness in the outcome depended on its true value?                                                                                     | NA            |
|                      |                                                    | Risk of bias judgement                                                                                                                                                              | Low           |
|                      | Bias in measurement of the outcome                 | 4.1 Was the method of measuring the outcome inappropriate?                                                                                                                          | N             |
|                      |                                                    | 4.2 Could measurement or ascertainment of the outcome have differed between intervention groups?                                                                                    | PY            |
|                      |                                                    | 4.3 Were outcome assessors aware of the intervention received by study participants?                                                                                                | NA            |
|                      |                                                    | 4.4 If Y/PY/NI to 4.3: Could assessment of the outcome have been influenced by knowledge of intervention received?                                                                  | NA            |
|                      |                                                    | 4.5 If Y/PY/NI to 4.4: Is it likely that assessment of the outcome was influenced by knowledge of intervention received?                                                            | NA            |
|                      |                                                    | Risk of bias judgement                                                                                                                                                              | Some concerns |
|                      | Bias in selection of the reported result           | 5.1 Were the data that produced this result analysed in accordance with a pre-specified analysis plan that was finalized before unblinded outcome data were available for analysis? | PY            |
|                      |                                                    | 5.2 ... multiple eligible outcome measurements (e.g. scales, definitions, time points) within the outcome domain?                                                                   | PN            |
|                      |                                                    | 5.3 ... multiple eligible analyses of the data?                                                                                                                                     | N             |

|                     |                                                    |                                                                                                                                                                                     |               |
|---------------------|----------------------------------------------------|-------------------------------------------------------------------------------------------------------------------------------------------------------------------------------------|---------------|
|                     |                                                    | Risk of bias judgement                                                                                                                                                              | Low           |
|                     | Overall bias                                       | Risk of bias judgement                                                                                                                                                              | Low           |
| Saedi et al. (2016) | Bias arising from the randomization process        | 1.1 Was the allocation sequence random?                                                                                                                                             | Y             |
|                     |                                                    | 1.2 Was the allocation sequence concealed until participants were enrolled and assigned to interventions?                                                                           | NI            |
|                     |                                                    | 1.3 Did baseline differences between intervention groups suggest a problem with the randomization process?                                                                          | N             |
|                     |                                                    | Risk of bias judgement                                                                                                                                                              | Some concerns |
|                     | Bias due to deviations from intended interventions | 2.1. Were participants aware of their assigned intervention during the trial?                                                                                                       | PY            |
|                     |                                                    | 2.2. Were carers and people delivering the interventions aware of participants' assigned intervention during the trial?                                                             | PY            |
|                     |                                                    | 2.3. If Y/PY/NI to 2.1 or 2.2: Were there deviations from the intended intervention that arose because of the experimental context?                                                 | PN            |
|                     |                                                    | 2.4 If Y/PY to 2.3: Were these deviations likely to have affected the outcome?                                                                                                      | NA            |
|                     |                                                    | 2.5. If Y/PY/NI to 2.4: Were these deviations from intended intervention balanced between groups?                                                                                   | NA            |
|                     |                                                    | 2.6 Was an appropriate analysis used to estimate the effect of assignment to intervention?                                                                                          | PY            |
|                     |                                                    | 2.7 If N/PN/NI to 2.6: Was there potential for a substantial impact (on the result) of the failure to analyse participants in the group to which they were randomized?              | NA            |
|                     |                                                    | Risk of bias judgement                                                                                                                                                              | Low           |
|                     | Bias due to missing outcome data                   | 3.1 Were data for this outcome available for all, or nearly all, participants randomized?                                                                                           | Y             |
|                     |                                                    | 3.2 If N/PN/NI to 3.1: Is there evidence that result was not biased by missing outcome data?                                                                                        | NA            |
|                     |                                                    | 3.3 If N/PN to 3.2: Could missingness in the outcome depend on its true value?                                                                                                      | NA            |
|                     |                                                    | 3.4 If Y/PY/NI to 3.3: Is it likely that missingness in the outcome depended on its true value?                                                                                     | NA            |
|                     |                                                    | Risk of bias judgement                                                                                                                                                              | Low           |
|                     | Bias in measurement of the outcome                 | 4.1 Was the method of measuring the outcome inappropriate?                                                                                                                          | PN            |
|                     |                                                    | 4.2 Could measurement or ascertainment of the outcome have differed between intervention groups?                                                                                    | PN            |
|                     |                                                    | 4.3 Were outcome assessors aware of the intervention received by study participants?                                                                                                | PY            |
|                     |                                                    | 4.4 If Y/PY/NI to 4.3: Could assessment of the outcome have been influenced by knowledge of intervention received?                                                                  | PN            |
|                     |                                                    | 4.5 If Y/PY/NI to 4.4: Is it likely that assessment of the outcome was influenced by knowledge of intervention received?                                                            | NA            |
|                     |                                                    | Risk of bias judgement                                                                                                                                                              | Low           |
|                     | Bias in selection of the reported result           | 5.1 Were the data that produced this result analysed in accordance with a pre-specified analysis plan that was finalized before unblinded outcome data were available for analysis? | PY            |
|                     |                                                    | 5.2 ... multiple eligible outcome measurements (e.g. scales, definitions, time points) within the outcome domain?                                                                   | PN            |
|                     |                                                    | 5.3 ... multiple eligible analyses of the data?                                                                                                                                     | PN            |
|                     |                                                    | Risk of bias judgement                                                                                                                                                              | Low           |

| Overall bias | Risk of bias judgement                             | Some concerns                                                                                                                                                                          |
|--------------|----------------------------------------------------|----------------------------------------------------------------------------------------------------------------------------------------------------------------------------------------|
| Reese (2008) | Bias arising from the randomization process        | 1.1 Was the allocation sequence random? Y                                                                                                                                              |
|              |                                                    | 1.2 Was the allocation sequence concealed until participants were enrolled and assigned to interventions? NI                                                                           |
|              |                                                    | 1.3 Did baseline differences between intervention groups suggest a problem with the randomization process? PN                                                                          |
|              | Risk of bias judgement                             | Some concerns                                                                                                                                                                          |
|              |                                                    | 2.1. Were participants aware of their assigned intervention during the trial? PY                                                                                                       |
|              |                                                    | 2.2. Were carers and people delivering the interventions aware of participants' assigned intervention during the trial? PY                                                             |
|              |                                                    | 2.3. If Y/PY/NI to 2.1 or 2.2: Were there deviations from the intended intervention that arose because of the experimental context? PN                                                 |
|              | Bias due to deviations from intended interventions | 2.4 If Y/PY to 2.3: Were these deviations likely to have affected the outcome? NA                                                                                                      |
|              |                                                    | 2.5. If Y/PY/NI to 2.4: Were these deviations from intended intervention balanced between groups? NA                                                                                   |
|              |                                                    | 2.6 Was an appropriate analysis used to estimate the effect of assignment to intervention? Y                                                                                           |
|              |                                                    | 2.7 If N/PN/NI to 2.6: Was there potential for a substantial impact (on the result) of the failure to analyse participants in the group to which they were randomized? NA              |
|              | Risk of bias judgement                             | Low                                                                                                                                                                                    |
|              |                                                    | 3.1 Were data for this outcome available for all, or nearly all, participants randomized? PY                                                                                           |
|              | Bias due to missing outcome data                   | 3.2 If N/PN/NI to 3.1: Is there evidence that result was not biased by missing outcome data? NA                                                                                        |
|              |                                                    | 3.3 If N/PN to 3.2: Could missingness in the outcome depend on its true value? NA                                                                                                      |
|              |                                                    | 3.4 If Y/PY/NI to 3.3: Is it likely that missingness in the outcome depended on its true value? NA                                                                                     |
|              | Risk of bias judgement                             | Low                                                                                                                                                                                    |
|              |                                                    | 4.1 Was the method of measuring the outcome inappropriate? N                                                                                                                           |
|              | Bias in measurement of the outcome                 | 4.2 Could measurement or ascertainment of the outcome have differed between intervention groups? PN                                                                                    |
|              |                                                    | 4.3 Were outcome assessors aware of the intervention received by study participants? PY                                                                                                |
|              |                                                    | 4.4 If Y/PY/NI to 4.3: Could assessment of the outcome have been influenced by knowledge of intervention received? NI                                                                  |
|              |                                                    | 4.5 If Y/PY/NI to 4.4: Is it likely that assessment of the outcome was influenced by knowledge of intervention received? PN                                                            |
|              | Risk of bias judgement                             | Some concerns                                                                                                                                                                          |
|              |                                                    | 5.1 Were the data that produced this result analysed in accordance with a pre-specified analysis plan that was finalized before unblinded outcome data were available for analysis? PY |
|              | Bias in selection of the reported result           | 5.2 ... multiple eligible outcome measurements (e.g. scales, definitions, time points) within the outcome domain? PN                                                                   |
|              |                                                    | 5.3 ... multiple eligible analyses of the data? PN                                                                                                                                     |

|              |                        |     |
|--------------|------------------------|-----|
|              | Risk of bias judgement | Low |
| Overall bias | Risk of bias judgement | Low |

Y: yes; PY: probably yes; PN: probably no; N: no; NI: no information; NA: no answe
