# Supplementary material for: Alexithymia in Patients with Somatization Difficulties and Tinnitus-Related Distress: A Systematic Review
Source: J Clin Med. 2023 Oct 29;12(21):6828. doi: 10.3390/jcm12216828 (PMC10649228; doi:10.3390/jcm12216828)
Supplement: Supplementary file 1 [file jcm-12-06828-s001.zip]

Archive with 4 entries (4 files):
- SupplementaryTable S1.pdf
- SupplementaryTable S2.pdf
- SupplementaryTable S3.pdf
- SupplementaryTable S4.pdf
